# Supplementary material
Source: HighWire-hosted journal article supplement (https://cmajopen-stage.highwire.org/highwire/filestream/90106/field_highwire_adjunct_files/2/open-2021-0318-3-at.pdf)
Supplement: open-2021-0318-3-at.pdf [file open-2021-0318-3-at.pdf]

**Supplemental Table 1.** Baseline characteristics of participants included in the analysis compared those excluded.

|                                     | <b>Total</b><br>(n=52, 769) | <b>Included<sup>1</sup></b><br>(n=13, 988) | <b>Excluded<sup>2</sup></b><br>(n=38, 781) | <b>Standardized<br/>Difference</b> |
|-------------------------------------|-----------------------------|--------------------------------------------|--------------------------------------------|------------------------------------|
| Age (yrs±SD) <sup>3</sup>           | 51.2±9.4                    | 52.4±9.3                                   | 50.8±9.4                                   | <b>-0.17</b>                       |
| Females n (%)                       | 33, 626 (63.7)              | 9, 710 (69.4)                              | 23, 916 (61.7)                             | <b>0.16</b>                        |
| Statin use n (%)                    | 9, 163 (17.4)               | 2, 639 (18.9)                              | 6, 524 (16.8)                              | <b>0.05</b>                        |
| Elixhauser score (±SD) <sup>4</sup> | 2.58±2.27                   | 2.79±2.19                                  | 2.50±2.29                                  | <b>-0.13</b>                       |
| CVD incidence n (%)                 | 4, 622 (8.8)                | 1, 156 (8.3)                               | 3, 466 (8.9)                               | <b>0.02</b>                        |

Data presented as mean± SD or n(%). CVD, cardiovascular disease.

<sup>1</sup>All participants included in the present analysis

<sup>2</sup>Participants excluded because blood samples not provided or not processed at time of data linkage, missing complete lipid panel, negative calculated LDL-C or RC value, TG ≥ 4.5 mmol/L, missing date of blood draw variable, pre-existing CVD

<sup>3</sup>Age at baseline for those with non-missing age variable (n=13, 982 included and n=38, 746 excluded)

<sup>4</sup>Elixhauser score prior to enrollment date for those included and excluded

**Supplemental Table 2.** Mean non-fasting RC and LDL-C for those with and without prevalence of composite CVD.

| <b>Lipid</b> | <b>Total<br/>(n=15, 764)</b> | <b>Without prevalent CVD<br/>(n=13, 988)</b> | <b>With prevalent CVD<br/>(n=1, 776)</b> | <b>p-value<br/>(with vs without)</b> |
|--------------|------------------------------|----------------------------------------------|------------------------------------------|--------------------------------------|
| RC           | 0.79±0.38                    | 0.78±0.38                                    | 0.86±0.39                                | <b>&lt;0.0001</b>                    |
| LDL-C        | 2.83±0.87                    | 2.86±0.85                                    | 2.59±0.96                                | <b>&lt;0.0001</b>                    |

Data presented as mean ± SD. CVD, cardiovascular disease; LDL-C, low-density lipoprotein cholesterol; RC, remnant cholesterol.

**Supplemental Table 3.** Results from multivariable logistic regression model for continuous lipid variables and incident composite CVD primary outcome.

| Variable                     | Odds ratios (95% CI) | p-value |
|------------------------------|----------------------|---------|
| RC                           | 1.48 (1.27-1.73)     | <0.001  |
| LDL-C                        | 0.73 (0.68-0.79)     | <0.001  |
| Age                          | 1.09 (1.08-1.09)     | <0.001  |
| Sex                          | 0.75 (0.66-0.85)     | <0.001  |
| Statin use                   | 0.79 (0.68-0.93)     | 0.004   |
| Elixhauser comorbidity index | 0.95 (0.92-0.98)     | <0.001  |

Data presented as adjusted (by multivariable logistic regression) OR (CI). CVD, cardiovascular disease; LDL-C, low-density lipoprotein cholesterol; RC, remnant cholesterol.

**Supplemental Table 4.** Adjusted odds ratios for composite CVD incidence per mmol/L increase of non-fasting RC and LDL-C, adjusted and unadjusted for LDL-C and RC respectively.

|       |             | Adjusted for lipids <sup>1</sup> |         | Unadjusted for lipids <sup>2</sup> |         |
|-------|-------------|----------------------------------|---------|------------------------------------|---------|
|       | CVD n (%)   | OR                               | p-value | OR                                 | p-value |
| RC    | 1,156 (8.3) | 1.48 (1.27-1.73)                 | <0.001  | 1.48 (1.26-1.73)                   | <0.001  |
| LDL-C |             | 0.73 (0.68-0.79)                 | <0.001  | 0.73 (0.68-0.79)                   | <0.001  |

Data presented as adjusted (by multivariable logistic regression) OR (CI). CVD, cardiovascular disease; LDL-C, low-density lipoprotein cholesterol; RC, remnant cholesterol.

<sup>1</sup>One multivariable logistic regression model which included age, sex, statin use, Elixhauser comorbidity index, RC and LDL-C.

<sup>2</sup>Separate multivariable logistic regression models for RC and LDL-C, each adjusting for only age, sex, statin use and Elixhauser comorbidity index.

**Supplemental Table 5.** Unadjusted and adjusted hazard ratios for composite CVD incidence per mmol/L increase of non-fasting RC and LDL-C.

| Lipid        | CVD<br>n (%) | Unadjusted       |                  | Adjusted <sup>1</sup> |                  |
|--------------|--------------|------------------|------------------|-----------------------|------------------|
|              |              | HR               | p-value          | HR                    | p-value          |
| <b>RC</b>    | 1,156        | 1.51 (1.31-1.74) | <b>&lt;0.001</b> | 1.28 (1.11-1.48)      | <b>0.001</b>     |
| <b>LDL-C</b> | (8.3)        | 0.74 (0.69-0.80) | <b>&lt;0.001</b> | 0.76 (0.71-0.82)      | <b>&lt;0.001</b> |

Data presented as unadjusted and adjusted (by cox proportional hazard regression) HR (CI). CVD, cardiovascular disease; HR, hazard ratio; LDL-C, low-density lipoprotein cholesterol; RC, remnant cholesterol.

<sup>1</sup>Adjusted model included age, sex, statin use, Elixhauser comorbidity index, LDL-C and RC.

**Supplemental Table 6.** Adjusted odds ratios of CVD incidence per mmol/L increase of non-fasting RC and LDL-C, stratified by sex.

|                     | Males        |                  |         | Females          |                  |         |
|---------------------|--------------|------------------|---------|------------------|------------------|---------|
| RC <sup>1</sup>     | CVD<br>n (%) | OR               | p-value | CVD<br>n (%)     | OR               | p-value |
| CVD composite       | 486 (11.4)   | 1.10 (0.87-1.40) | 0.42    | 670 (6.9)        | 1.77 (1.44-2.19) | <0.001  |
| IHD                 | 447 (10.5)   | 1.09 (0.86-1.40) | 0.47    | 609 (6.3)        | 1.80 (1.45-2.23) | <0.001  |
| ACS <sup>2</sup>    | 101 (2.4)    | 1.15 (0.72-1.84) | 0.56    | 52 (0.54)        | 2.01 (1.03-3.91) | 0.04    |
| HF                  | 67 (1.6)     | 1.32 (0.74-2.36) | 0.35    | 101 (1.0)        | 1.57 (0.95-2.60) | 0.08    |
| Stroke <sup>3</sup> | 32 (0.75)    | 0.94 (0.40-2.17) | 0.88    | n/a <sup>4</sup> | n/a              | n/a     |
| LDL-C <sup>1</sup>  | CVD<br>n (%) | OR               | p-value | CVD<br>n (%)     | OR               | p-value |
| CVD composite       | 486 (11.4)   | 0.65 (0.57-0.74) | <0.001  | 670 (6.9)        | 0.77 (0.70-0.85) | <0.001  |
| IHD                 | 447 (10.5)   | 0.65 (0.57-0.74) | <0.001  | 609 (6.3)        | 0.79 (0.71-0.87) | <0.001  |
| ACS <sup>2</sup>    | 101 (2.4)    | 0.56 (0.43-0.73) | <0.001  | 52 (0.54)        | 0.50 (0.35-0.71) | <0.001  |
| HF                  | 67 (1.6)     | 0.73 (0.53-1.00) | 0.05    | 101 (1.0)        | 0.58 (0.45-0.75) | <0.001  |
| Stroke <sup>3</sup> | 32 (0.75)    | 0.50 (0.31-0.80) | 0.004   | n/a <sup>4</sup> | n/a              | n/a     |

Data presented as adjusted (by multivariable logistic regression) OR (CI), stratified by sex. ACS, acute coronary syndrome; CVD, cardiovascular disease; HF, heart failure; IHD, ischemic heart disease; LDL-C, low-density lipoprotein cholesterol; OR, odds ratio; RC, remnant cholesterol.

<sup>1</sup>Adjusted model included age, statin use, Elixhauser comorbidity index, LDL-C and RC after stratification by sex.

<sup>2</sup>Aggregate of myocardial infarction and angina.

<sup>3</sup>Aggregate of transient ischemic attack and acute ischemic stroke.

<sup>4</sup>n/a indicates too few case numbers to report.

**Supplemental Table 7.** Adjusted odds ratios of CVD incidence per mmol/L increase of non-fasting RC and LDL-C, stratified by statin use.

|                     | Statin non-users |                  |                  | Statin users     |                  |              |
|---------------------|------------------|------------------|------------------|------------------|------------------|--------------|
| RC <sup>1</sup>     | CVD<br>n (%)     | OR               | p-value          | CVD<br>n (%)     | OR               | p-value      |
| CVD composite       | 859 (7.6)        | 1.52 (1.26-1.82) | <b>&lt;0.001</b> | 297 (11.3)       | 1.32 (0.98-1.79) | 0.07         |
| IHD                 | 773 (6.8)        | 1.52 (1.25-1.83) | <b>&lt;0.001</b> | 283 (10.6)       | 1.35 (1.00-1.84) | 0.05         |
| ACS <sup>2</sup>    | 100 (0.90)       | 1.97 (1.25-3.10) | <b>0.004</b>     | 53 (1.9)         | 0.72 (0.35-1.48) | 0.38         |
| HF                  | 107 (0.97)       | 1.70 (1.07-2.72) | <b>0.03</b>      | 61 (2.1)         | 1.11 (0.59-2.10) | 0.74         |
| Stroke <sup>3</sup> | 34 (0.31)        | 0.79 (0.33-1.93) | 0.61             | n/a <sup>4</sup> | n/a              | n/a          |
| LDL-C <sup>1</sup>  | CVD<br>n (%)     | OR               | p-value          | CVD<br>n (%)     | OR               | p-value      |
| CVD composite       | 859 (7.6)        | 0.68 (0.62-0.74) | <b>&lt;0.001</b> | 297 (11.3)       | 0.83 (0.73-0.94) | <b>0.004</b> |
| IHD                 | 773 (6.8)        | 0.69 (0.62-0.76) | <b>&lt;0.001</b> | 283 (10.6)       | 0.84 (0.73-0.96) | <b>0.009</b> |
| ACS <sup>2</sup>    | 100 (0.90)       | 0.36 (0.27-0.47) | <b>&lt;0.001</b> | 53 (1.9)         | 0.98 (0.73-1.31) | 0.87         |
| HF                  | 107 (0.97)       | 0.51 (0.39-0.67) | <b>&lt;0.001</b> | 61 (2.1)         | 0.81 (0.61-1.07) | 0.14         |
| Stroke <sup>3</sup> | 34 (0.31)        | 0.41 (0.26-0.67) | <b>&lt;0.001</b> | n/a <sup>4</sup> | n/a              | n/a          |

Data presented as adjusted (by multivariable logistic regression) OR (CI), stratified by statin use. ACS, acute coronary syndrome; CVD, cardiovascular disease; HF, heart failure; IHD, ischemic heart disease; LDL-C, low-density lipoprotein cholesterol; OR, odds ratio; RC, remnant cholesterol.

<sup>1</sup>Adjusted model included age, sex, Elixhauser comorbidity index, LDL-C and RC after stratification by statin use.

<sup>2</sup>Aggregate of myocardial infarction and angina.

<sup>3</sup>Aggregate of transient ischemic attack and acute ischemic stroke.

<sup>4</sup>n/a indicates too few case numbers to report.

**Supplemental Table 8.** Results from multivariable logistic regression model for categorical lipid variables and incident composite CVD primary outcome.

| Variable                     | Odds ratios (95% CI) | p-value          |
|------------------------------|----------------------|------------------|
| RC                           |                      |                  |
| Q1                           | 1                    | Reference        |
| Q2                           | 0.97 (0.80-1.19)     | 0.80             |
| Q3                           | 1.38 (1.15-1.67)     | <b>0.001</b>     |
| Q4                           | 1.46 (1.22-1.76)     | <b>&lt;0.001</b> |
| LDL-C                        |                      |                  |
| Q1                           | 1                    | Reference        |
| Q2                           | 0.63 (0.53-0.75)     | <b>&lt;0.001</b> |
| Q3                           | 0.52 (0.44-0.63)     | <b>&lt;0.001</b> |
| Q4                           | 0.52 (0.43-0.62)     | <b>&lt;0.001</b> |
| Age                          | 1.09 (1.08-0.09)     | <b>&lt;0.001</b> |
| Sex                          | 0.73 (0.65-0.84)     | <b>&lt;0.001</b> |
| Statin use                   | 0.77 (0.66-0.90)     | <b>0.001</b>     |
| Elixhauser comorbidity index | 0.95 (0.92-0.98)     | <b>&lt;0.001</b> |

Data presented as adjusted (by multivariable logistic regression) OR (CI). CVD, cardiovascular disease; LDL-C, low-density lipoprotein cholesterol; RC, remnant cholesterol.



**Supplemental Table 9.** Adjusted odds ratios of composite CVD incidence by quartile of non-fasting RC and LDL-C, stratified by sex.

|                                   | <b>Males</b>     |                  | <b>Females</b>   |                  |
|-----------------------------------|------------------|------------------|------------------|------------------|
| <b>RC Quartile<sup>1</sup></b>    | <b>OR</b>        | <b>p-value</b>   | <b>OR</b>        | <b>p-value</b>   |
| 1                                 | 1                | (reference)      | 1                | (reference)      |
| 2                                 | 0.85 (0.61-1.17) | 0.32             | 1.04 (0.81-1.33) | 0.77             |
| 3                                 | 1.26 (0.93-1.70) | 0.14             | 1.41 (1.11-1.80) | <b>0.005</b>     |
| 4                                 | 1.10 (0.83-1.48) | 0.50             | 1.71 (1.34-2.17) | <b>&lt;0.001</b> |
| <b>LDL-C Quartile<sup>1</sup></b> | <b>OR</b>        | <b>p-value</b>   | <b>OR</b>        | <b>p-value</b>   |
| 1                                 | 1                | (reference)      | 1                | (reference)      |
| 2                                 | 0.65 (0.50-0.84) | <b>0.001</b>     | 0.61 (0.48-0.76) | <b>&lt;0.001</b> |
| 3                                 | 0.46 (0.34-0.61) | <b>&lt;0.001</b> | 0.55 (0.44-0.70) | <b>&lt;0.001</b> |
| 4                                 | 0.46 (0.35-0.62) | <b>&lt;0.001</b> | 0.54 (0.43-0.67) | <b>&lt;0.001</b> |

Data presented as adjusted (by multivariable logistic regression) OR (CI), stratified by sex. LDL-C, low-density lipoprotein cholesterol; OR, odds ratio; RC, remnant cholesterol.

<sup>1</sup>Adjusted model included age, statin use, Elixhauser comorbidity index, RC and LDL-C after stratification by sex.

**Supplemental Table 10.** Adjusted odds ratios of composite CVD incidence by quartiles of non-fasting RC and LDL-C, stratified by statin use.

|                             | Statin non-user  |                  | Statin user      |             |
|-----------------------------|------------------|------------------|------------------|-------------|
| RC Quartile <sup>1</sup>    | OR               | p-value          | OR               | p-value     |
| 1                           | 1                | (reference)      | 1                | (reference) |
| 2                           | 0.95 (0.77-1.19) | 0.68             | 1.03 (0.65-1.63) | 0.89        |
| 3                           | 1.43 (1.15-1.76) | <b>0.001</b>     | 1.23 (0.80-1.89) | 0.35        |
| 4                           | 1.51 (1.22-1.86) | <b>&lt;0.001</b> | 1.28 (0.84-1.93) | 0.25        |
| LDL-C Quartile <sup>1</sup> | OR               | p-value          | OR               | p-value     |
| 1                           | 1                | (reference)      | 1                | (reference) |
| 2                           | 0.52 (0.42-0.63) | <b>&lt;0.001</b> | 0.97 (0.71-1.33) | 0.84        |
| 3                           | 0.44 (0.36-0.54) | <b>&lt;0.001</b> | 0.80 (0.55-1.17) | 0.25        |
| 4                           | 0.45 (0.37-0.56) | <b>&lt;0.001</b> | 0.63 (0.44-0.90) | <b>0.01</b> |

Data presented as adjusted (by multivariable logistic regression) OR (CI), stratified by statin use. LDL-C, low-density lipoprotein cholesterol; OR, odds ratio; RC, remnant cholesterol.

<sup>1</sup>Adjusted model included age, sex, Elixhauser comorbidity index, RC and LDL-C after stratification by statin use.

**Supplemental Table 11.** Unadjusted and adjusted hazard ratios for composite CVD incidence by quartile of non-fasting RC and LDL-C.

|       |          | Unadjusted       |             | Adjusted <sup>1</sup> |             |
|-------|----------|------------------|-------------|-----------------------|-------------|
| Lipid | Quartile | HR               | p-value     | HR                    | p-value     |
| RC    | 1        | 1                | (reference) | 1                     | (reference) |
|       | 2        | 1.04 (0.86-1.25) | 0.70        | 0.95 (0.79-1.15)      | 0.62        |
|       | 3        | 1.38 (1.16-1.64) | <0.001      | 1.21 (1.01-1.44)      | 0.04        |
|       | 4        | 1.54 (1.30-1.82) | <0.001      | 1.27 (1.07-1.51)      | 0.007       |
| LDL-C | 1        | 1                | (reference) | 1                     | (reference) |
|       | 2        | 0.65 (0.56-0.76) | <0.001      | 0.67 (0.57-0.78)      | <0.001      |
|       | 3        | 0.56 (0.48-0.66) | <0.001      | 0.56 (0.48-0.66)      | <0.001      |
|       | 4        | 0.59 (0.50-0.69) | <0.001      | 0.58 (0.49-0.68)      | <0.001      |

Data presented as unadjusted and adjusted (by cox proportional hazard regression) HR (CI). HR, hazard ratio; LDL-C, low-density lipoprotein cholesterol; RC, remnant cholesterol.

<sup>1</sup>Adjusted model included age, sex, statin use, Elixhauser comorbidity index, RC and LDL-C.

**Supplemental Table 12.** Number of prevalent cases of composite CVD, by quartile of non-fasting RC and LDL-C.

|                               | RC (mmol/L)  |               |               |               |  | LDL-C (mmol/L) |              |              |              |
|-------------------------------|--------------|---------------|---------------|---------------|--|----------------|--------------|--------------|--------------|
|                               | Q1<br>n=4015 | Q2<br>n=3976  | Q3<br>n=3907  | Q4<br>n=3866  |  | Q1<br>n=3994   | Q2<br>n=3940 | Q3<br>n=3894 | Q4<br>n=3936 |
| <b>CVD composite</b><br>n (%) | 325<br>(8.1) | 444<br>(11.2) | 466<br>(11.9) | 541<br>(14.0) |  | 696<br>(17.4)  | 367<br>(9.3) | 353<br>(9.1) | 360<br>(9.2) |

CVD, cardiovascular disease; LDL-C, low-density lipoprotein cholesterol; RC, remnant cholesterol; Q, quartile.

**Supplemental Table 13.** Adjusted and unadjusted odds ratios of CVD prevalence per mmol/L increase of non-fasting RC and LDL-C.

|                     |              | Unadjusted       |         | Adjusted <sup>1</sup> |         |
|---------------------|--------------|------------------|---------|-----------------------|---------|
| RC                  | CVD<br>n (%) | OR               | p-value | OR                    | p-value |
| CVD composite       | 1,766 (11.3) | 1.65 (1.46-1.87) | <0.001  | 1.40 (1.21-1.62)      | <0.001  |
| IHD                 | 1,657 (10.5) | 1.68 (1.48-1.90) | <0.001  | 1.41 (1.22-1.63)      | <0.001  |
| ACS <sup>2</sup>    | 303 (1.9)    | 1.46 (1.11-1.93) | 0.008   | 0.93 (0.69-1.26)      | 0.64    |
| HF                  | 289 (1.8)    | 1.72 (1.30-2.27) | <0.001  | 1.30 (0.95-1.78)      | 0.10    |
| Stroke <sup>3</sup> | 67 (0.43)    | 1.36 (0.75-2.45) | 0.32    | 0.95 (0.51-1.77)      | 0.87    |
| LDL-C               | CVD<br>n (%) | OR               | p-value | OR                    | p-value |
| CVD composite       | 1,766 (11.3) | 0.68 (0.64-0.72) | <0.001  | 0.72 (0.67-0.77)      | <0.001  |
| IHD                 | 1,657 (10.5) | 0.67 (0.63-0.71) | <0.001  | 0.71 (0.66-0.76)      | <0.001  |
| ACS <sup>2</sup>    | 303 (1.9)    | 0.35 (0.30-0.40) | <0.001  | 0.37 (0.31-0.44)      | <0.001  |
| HF                  | 289 (1.8)    | 0.64 (0.55-0.73) | <0.001  | 0.73 (0.62-0.85)      | <0.001  |
| Stroke <sup>3</sup> | 67 (0.43)    | 0.43 (0.32-0.58) | <0.001  | 0.48 (0.34-0.66)      | <0.001  |

Data presented as unadjusted and adjusted (by multivariable logistic regression) OR (CI). ACS, acute coronary syndrome; CVD, cardiovascular disease; HF, heart failure; IHD, ischemic heart disease; LDL-C, low-density lipoprotein cholesterol; OR, odds ratio; RC, remnant cholesterol.

<sup>1</sup>Adjusted model included age, sex, statin use, Elixhauser comorbidity index, RC and LDL-C.

<sup>2</sup>Aggregate of myocardial infarction and angina.

<sup>3</sup>Aggregate of transient ischemic attack and acute ischemic stroke.

**Supplemental Table 14.** Adjusted odds ratios for CVD prevalence per mmol/L increase of non-fasting RC and LDL-C, stratified by sex.

| RC <sup>1</sup>     | Males        |                  |                  | Females      |                  |                  |
|---------------------|--------------|------------------|------------------|--------------|------------------|------------------|
|                     | CVD<br>n (%) | OR               | p-value          | CVD<br>n (%) | OR               | p-value          |
| CVD composite       | 848 (16.5)   | 1.27 (1.03-1.57) | <b>0.03</b>      | 928 (8.7)    | 1.44 (1.18-1.75) | <b>&lt;0.001</b> |
| IHD                 | 809 (15.8)   | 1.28 (1.04-1.59) | <b>0.02</b>      | 848 (8.0)    | 1.43 (1.17-1.75) | <b>0.001</b>     |
| ACS <sup>2</sup>    | 219 (4.3)    | 0.82 (0.57-1.17) | 0.28             | 84 (0.79)    | 1.12 (0.62-2.02) | 0.71             |
| HF                  | 146 (2.9)    | 1.23 (0.80-1.91) | 0.35             | 143 (1.3)    | 1.39 (0.88-2.19) | 0.16             |
| Stroke <sup>3</sup> | 32 (0.62)    | 0.74 (0.30-1.82) | 0.52             | 35 (0.33)    | 1.23 (0.52-2.92) | 0.64             |
| LDL-C <sup>1</sup>  | CVD<br>n (%) | OR               | p-value          | CVD<br>n (%) | OR               | p-value          |
| CVD composite       | 848 (16.5)   | 0.60 (0.54-0.67) | <b>&lt;0.001</b> | 928 (8.7)    | 0.81 (0.74-0.89) | <b>&lt;0.001</b> |
| IHD                 | 809 (15.8)   | 0.59 (0.52-0.65) | <b>&lt;0.001</b> | 848 (8.0)    | 0.81 (0.74-0.89) | <b>&lt;0.001</b> |
| ACS <sup>2</sup>    | 219 (4.3)    | 0.30 (0.24-0.37) | <b>&lt;0.001</b> | 84 (0.79)    | 0.57 (0.43-0.76) | <b>&lt;0.001</b> |
| HF                  | 146 (2.9)    | 0.67 (0.53-0.84) | <b>0.001</b>     | 143 (1.3)    | 0.80 (0.64-0.99) | <b>0.04</b>      |
| Stroke <sup>3</sup> | 32 (0.62)    | 0.44 (0.27-0.73) | <b>0.001</b>     | 35 (0.33)    | 0.51 (0.32-0.80) | <b>0.003</b>     |

Data presented as adjusted (by multivariable logistic regression) OR (CI), stratified by sex. ACS, acute coronary syndrome; CVD, cardiovascular disease; HF, heart failure; IHD, ischemic heart disease; LDL-C, low-density lipoprotein cholesterol; OR, odds ratio; RC, remnant cholesterol.

<sup>1</sup>Adjusted model included age, statin use, Elixhauser comorbidity index, RC and LDL-C after stratification by sex.

<sup>2</sup>Aggregate of myocardial infarction and angina.

<sup>3</sup>Aggregate of transient ischemic attack and acute ischemic stroke.

**Supplemental Table 15.** Adjusted odds ratios of CVD prevalence per mmol/L increase of non-fasting RC and LDL-C, stratified by statin use.

| RC <sup>1</sup>     | Statin non-user |                  |         | Statin user      |                  |         |
|---------------------|-----------------|------------------|---------|------------------|------------------|---------|
|                     | CVD<br>n (%)    | OR               | p-value | CVD<br>n (%)     | OR               | p-value |
| CVD composite       | 1610 (12.4)     | 1.41 (1.21-1.64) | <0.001  | 166 (5.9)        | 1.30 (0.86-1.97) | 0.22    |
| IHD                 | 1494 (11.6)     | 1.42 (1.22-1.66) | <0.001  | 163 (5.7)        | 1.26 (0.83-1.90) | 0.28    |
| ACS <sup>2</sup>    | 241 (2.0)       | 0.97 (0.68-1.38) | 0.87    | 62 (1.7)         | 0.92 (0.48-1.78) | 0.82    |
| HF                  | 221 (1.8)       | 1.26 (0.87-1.83) | 0.21    | 68 (1.8)         | 1.51 (0.82-2.77) | 0.18    |
| Stroke <sup>3</sup> | 46 (0.39)       | 0.90 (0.42-1.91) | 0.77    | n/a <sup>4</sup> | n/a              | n/a     |
| LDL-C <sup>1</sup>  | CVD<br>n (%)    | OR               | p-value | CVD<br>n (%)     | OR               | p-value |
| CVD composite       | 1610 (12.4)     | 0.70 (0.65-0.75) | <0.001  | 166 (5.9)        | 0.88 (0.73-1.05) | 0.15    |
| IHD                 | 1494 (11.6)     | 0.68 (0.63-0.73) | <0.001  | 163 (5.7)        | 0.90 (0.75-1.08) | 0.25    |
| ACS <sup>2</sup>    | 241 (2.0)       | 0.27 (0.22-0.33) | <0.001  | 62 (1.7)         | 0.92 (0.69-1.23) | 0.56    |
| HF                  | 221 (1.8)       | 0.71 (0.59-0.85) | <0.001  | 68 (1.8)         | 0.80 (0.59-1.07) | 0.13    |
| Stroke <sup>3</sup> | 46 (0.39)       | 0.36 (0.24-0.54) | <0.001  | n/a <sup>4</sup> | n/a              | n/a     |

Data presented as adjusted (by multivariable logistic regression) OR (CI), stratified by statin use. ACS, acute coronary syndrome; CVD, cardiovascular disease; HF, heart failure; IHD, ischemic heart disease; LDL-C, low-density lipoprotein cholesterol; OR, odds ratio; RC, remnant cholesterol.

<sup>1</sup>Adjusted model included age, sex, Elixhauser comorbidity index, RC and LDL-C after stratification by statin use.

<sup>2</sup>Aggregate of myocardial infarction and angina.

<sup>3</sup>Aggregate of transient ischemic attack and acute ischemic stroke.

<sup>4</sup>n/a indicates too few case numbers to report.

**Supplemental Table 16.** Adjusted odds ratios of composite CVD prevalence by quartile of non-fasting RC and LDL-C.

|                       | <b>Unadjusted</b> |                  | <b>Adjusted<sup>1</sup></b> |                  |
|-----------------------|-------------------|------------------|-----------------------------|------------------|
| <b>RC Quartile</b>    | <b>OR</b>         | <b>p-value</b>   | <b>OR</b>                   | <b>p-value</b>   |
| 1                     | 1                 | (reference)      | 1                           | (reference)      |
| 2                     | 1.43 (1.23-1.66)  | <b>&lt;0.001</b> | 1.33 (1.12-1.57)            | <b>0.001</b>     |
| 3                     | 1.54 (1.32-1.78)  | <b>&lt;0.001</b> | 1.31 (1.10-1.55)            | <b>0.002</b>     |
| 4                     | 1.85 (1.60-2.14)  | <b>&lt;0.001</b> | 1.50 (1.27-1.78)            | <b>&lt;0.001</b> |
| <b>LDL-C Quartile</b> | <b>OR</b>         | <b>p-value</b>   | <b>OR</b>                   | <b>p-value</b>   |
| 1                     | 1                 | (reference)      | 1                           | (reference)      |
| 2                     | 0.49 (0.43-0.56)  | <b>&lt;0.001</b> | 0.49 (0.42-0.57)            | <b>&lt;0.001</b> |
| 3                     | 0.47 (0.41-0.54)  | <b>&lt;0.001</b> | 0.45 (0.38-0.53)            | <b>&lt;0.001</b> |
| 4                     | 0.48 (0.42-0.55)  | <b>&lt;0.001</b> | 0.47 (0.40-0.55)            | <b>&lt;0.001</b> |

Data presented as unadjusted and adjusted (by multivariable logistic regression) OR (CI). LDL-C, low-density lipoprotein cholesterol; OR, odds ratio; RC, remnant cholesterol.

<sup>1</sup>Adjusted model included age, sex, statin use, Elixhauser comorbidity index, RC and LDL-C.



**Supplemental Table 17.** Adjusted odds ratios for composite CVD prevalence by quartile of non-fasting RC and LDL-C, stratified by sex.

| RC Quartile <sup>1</sup>    | Males            |                  | Females          |                  |
|-----------------------------|------------------|------------------|------------------|------------------|
|                             | OR               | p-value          | OR               | p-value          |
| 1                           | 1                | (reference)      | 1                | (reference)      |
| 2                           | 1.43 (1.08-1.90) | <b>0.01</b>      | 1.25 (1.01-1.55) | <b>0.04</b>      |
| 3                           | 1.36 (1.03-1.79) | <b>0.03</b>      | 1.25 (1.00-1.55) | 0.05             |
| 4                           | 1.55 (1.19-2.02) | <b>0.001</b>     | 1.43 (1.15-1.78) | <b>0.002</b>     |
| LDL-C Quartile <sup>1</sup> | OR               | p-value          | OR               | p-value          |
|                             |                  |                  |                  |                  |
| 1                           | 1                | (reference)      | 1                | (reference)      |
| 2                           | 0.43 (0.34-0.54) | <b>&lt;0.001</b> | 0.55 (0.45-0.69) | <b>&lt;0.001</b> |
| 3                           | 0.35 (0.28-0.45) | <b>&lt;0.001</b> | 0.54 (0.44-0.67) | <b>&lt;0.001</b> |
| 4                           | 0.36 (0.28-0.47) | <b>&lt;0.001</b> | 0.56 (0.46-0.69) | <b>&lt;0.001</b> |

Data presented as unadjusted and adjusted (by multivariable logistic regression) OR (CI), stratified by sex. LDL-C, low-density lipoprotein cholesterol; OR, odds ratio; RC, remnant cholesterol.

<sup>1</sup>Adjusted model included age, statin use, Elixhauser comorbidity index, RC and LDL-C after stratification by sex.

**Supplemental Table 18.** Adjusted odds ratios for composite CVD prevalence by quartile of non-fasting RC and LDL-C, stratified by statin use.

| RC Quartile <sup>1</sup>    | Statin non-user  |                  | Statin user      |             |
|-----------------------------|------------------|------------------|------------------|-------------|
|                             | OR               | p-value          | OR               | p-value     |
| 1                           | 1                | (reference)      | 1                | (reference) |
| 2                           | 1.32 (1.11-1.58) | <b>0.002</b>     | 1.33 (0.72-2.48) | 0.36        |
| 3                           | 1.31 (1.09-1.56) | <b>0.003</b>     | 1.23 (0.68-2.22) | 0.50        |
| 4                           | 1.53 (1.28-1.82) | <b>&lt;0.001</b> | 1.22 (0.69-2.17) | 0.49        |
| LDL-C Quartile <sup>1</sup> | OR               |                  | OR               |             |
|                             | OR               | p-value          | OR               | p-value     |
| 1                           | 1                | (reference)      | 1                | (reference) |
| 2                           | 0.47 (0.40-0.56) | <b>&lt;0.001</b> | 0.60 (0.38-0.95) | <b>0.03</b> |
| 3                           | 0.44 (0.37-0.52) | <b>&lt;0.001</b> | 0.54 (0.31-0.96) | <b>0.04</b> |
| 4                           | 0.45 (0.38-0.53) | <b>&lt;0.001</b> | 0.62 (0.38-1.03) | 0.06        |

Data presented as unadjusted and adjusted (by multivariable logistic regression) OR (CI), stratified by statin use. LDL-C, low-density lipoprotein cholesterol; OR, odds ratio; RC, remnant cholesterol.

<sup>1</sup>Adjusted model included age, sex, Elixhauser comorbidity index, RC and LDL-C after stratification by statin use.
